# Supplementary material
Source: publisher figshare collection journal article supplement (https://tandf.figshare.com/ndownloader/files/24463243)
Supplement: Supplementary file 1 [file 24463243]

Appendix 2. Drug cost inputs.

| Category of therapy | Dual Therapy | | | | | Triple Therapy | | | | | Injection Therapy |
| --- | --- | --- | --- | --- | --- | --- | --- | --- | --- | --- | --- |
| Treatment | SGLT-2-i +MET | DPP-4-i +MET | SU +MET | GLP-1-RA +MET | INS +MET | SGLT-2-i +SU +MET | SGLT-2-i +DPP-4-i +MET | DPP-4-i +SU +MET | GLP-1-RA +SU +MET | INS +SU +MET | INS combination |
| Cost |  |  |  |  |  |  |  |  |  |  |  |
| Annual cost of treatment (NTD) | 11,388 | 8,440 | 1,334 | 36,600 | 1,643 | 12,483 | 14,454 | 10,082 | 37,695 | 1,334 | 1,643 |
| Annual cost of Insulin (NTD/kg) | NA | NA | NA | NA | 110.45 | NA | NA | NA | NA | 110.45 | 165.67 |

NA: not applicable.
